# Supplementary material
Source: Research Square preprint supplement (doi:10.21203/rs.3.rs-8449515/v1)
Supplement: Supplementary file 1 [file 1cc7b362143427859255a45b.xlsx]

## Sheet: Total
Platform	Duration	Shares	Likes	Comments	Days since published	mDISCREN	GQS	Sources	Contents
1	213	66	328	28	71	4	5	1	1
1	17	1359	2674	1576	1142	1	1	3	3
1	53	80	221	97	250	3	2	2	2
1	15	640	70000	3527	1765	1	1	3	3
1	140	902	12000	1305	1406	2	3	3	3
1	37	33	136	10	483	3	2	2	2
1	88	79	445	171	164	2	1	2	2
1	199	380	2900	1038	457	1	2	3	3
1	138	963	2559	637	749	2	2	3	3
1	54	21	121	14	355	3	2	2	2
1	31	130	132	8	695	1	1	3	2
1	61	233	324	116	950	5	5	1	1
1	129	632	2020	344	213	3	3	2	3
1	82	531	24000	1100	457	3	3	2	3
1	49	1889	985	127	87	4	4	1	3
1	40	3670	19000	4852	940	5	4	1	2
1	21	4	26	1	268	4	4	1	1
1	17	9	69	3	262	3	3	2	1
1	45	118	312	124	942	4	5	1	1
1	22	204	257	127	998	5	5	1	1
1	90	82	444	35	301	5	5	1	1
1	134	180	628	360	579	2	2	3	3
1	43	846	9432	466	1126	2	2	3	3
1	149	237	492	55	282	5	4	1	1
1	51	39	171	126	564	4	5	2	1
1	42	89	2196	584	128	1	1	3	3
1	34	4	55	1	204	3	3	2	2
1	46	611	933	307	1014	3	2	2	1
1	53	121	307	58	271	4	3	2	2
1	148	71	194	23	243	4	3	2	1
1	67	10	113	135	744	2	1	3	1
1	35	45	94	40	580	5	3	2	1
1	20	477	7301	1634	990	1	1	3	3
1	55	493	1348	513	147	3	2	1	2
1	274	1169	2177	2177	137	4	3	3	1
1	158	619	2125	444	128	5	5	1	1
1	196	66	91	1	303	5	3	1	1
1	135	109	145	1	357	3	4	1	2
1	70	63	61	2	314	3	2	2	2
1	164	1483	8665	581	1362	2	2	2	2
1	66	1637	1986	912	241	3	3	1	2
1	61	3	66	2	386	1	2	2	1
1	72	182	319	52	500	4	4	1	1
1	60	181	659	93	44	3	3	1	2
1	64	7	68	10	237	4	4	1	2
1	94	1	30	3	97	3	4	2	2
1	47	11	50	16	340	3	3	2	1
1	54	20	139	94	376	2	1	3	3
1	161	46	267	111	119	1	2	3	3
1	15	12	320	294	865	2	2	1	3
1	150	53	415	64	66	5	4	1	1
1	164	1108	3363	2314	252	4	5	1	2
1	18	246	1133	431	989	2	1	3	3
1	10	81	469	228	959	3	3	1	1
1	10	63	606	969	903	1	1	3	3
1	241	214	235	176	373	4	5	1	1
1	105	106	160	13	840	3	4	1	2
1	13	57	6709	1283	982	1	1	3	3
1	58	304	553	141	674	3	4	1	1
1	20	6019	16000	5271	623	2	2	2	3
1	88	114	260	114	989	4	3	1	1
1	111	425	2582	333	283	4	3	1	2
1	35	290	302	46	803	2	2	1	3
1	44	147	990	291	266	3	4	1	1
1	54	19	80	17	227	2	3	2	2
1	70	72	14000	1522	97	2	2	2	3
1	16	16	80	16	831	3	2	2	2
1	50	6	110	8	62	4	5	1	2
1	118	667	9873	298	275	5	4	1	2
1	233	6576	85000	14000	232	2	1	3	3
1	43	8411	35000	5418	1309	4	3	1	1
1	19	43	92	8	633	2	2	1	1
1	60	80	181	223	790	2	1	3	3
1	151	94	1023	13	92	4	3	1	1
1	44	18	141	6	465	2	1	2	1
1	29	49	1254	791	223	1	1	3	3
1	16	55	86	2	394	2	3	2	1
1	150	10000	8050	5930	593	1	1	3	3
1	58	216	2193	559	847	1	2	3	3
1	52	1	29	0	148	4	3	2	1
1	34	136	325	124	1275	3	3	2	1
1	168	363	343	444	285	4	5	1	1
1	44	370	184	19	141	5	5	1	1
1	187	3187	32000	7901	1279	4	3	3	3
1	9	7349	5666	4045	249	3	3	1	1
1	196	15	10	0	124	5	5	1	2
1	10	1790	3537	3177	210	3	3	1	1
1	41	1551	2516	933	879	4	4	1	1
1	39	249	527	321	711	4	4	2	1
1	65	979	1461	476	875	5	4	1	1
1	176	37	72	2	313	5	5	1	1
1	22	70	108	1	687	3	3	1	1
1	74	115	363	691	388	3	2	3	3
1	131	4	91	47	993	1	1	3	3
1	63	6	110	45	195	3	3	2	1
1	69	97	78	17	218	3	3	3	1
1	25	185	269	88	975	4	3	2	1
1	111	231	512	125	1845	5	4	1	1
1	162	2168	6677	6349	242	5	5	2	1
1	6	79	551	275	777	3	2	1	1
2	2591	24	34	2	1280	5	5	2	1
2	658	2271	20	1	972	5	5	1	1
2	275	36	5	5	615	5	5	1	1
2	1502	17	7	0	680	4	5	2	1
2	2819	22	30	0	444	5	5	2	1
2	7759	9	9	0	248	5	5	2	1
2	367	20	22	2	943	4	5	2	1
2	1010	15	4	0	1003	5	5	2	2
2	1278	4	2	1	605	5	4	1	1
2	78	6	6	3	553	4	4	1	1
2	146	17	56	15	1176	2	2	3	3
2	739	30	30	0	1342	5	5	2	1
2	1729	3	0	0	89	5	5	1	1
2	126	31	11	0	1916	4	4	2	1
2	833	5	2	1	1005	5	5	1	1
2	1539	3	4	1	56	4	3	2	2
2	2120	18	12	0	717	4	5	2	2
2	241	10	5	0	1035	5	5	2	1
2	1902	12	30	2	1126	5	4	2	1
2	383	4	2	0	992	5	4	2	1
2	637	22	10	0	161	5	5	1	2
2	2464	68	47	1	1079	4	4	2	1
2	111	3	7	0	1332	4	4	2	1
2	731	3	8	0	968	5	5	2	1
2	2700	22	30	5	851	4	5	1	1
2	657	1	4	0	1077	5	4	2	1
2	307	207	660	117	1218	3	3	3	3
2	1651	5	4	0	48	3	4	2	1
2	3395	23	22	0	1276	4	4	2	1
2	2878	16	16	2	974	4	4	2	1
2	3405	7	5	2	355	5	4	2	1
2	1837	4	8	0	1262	4	4	2	1
2	842	3	2	0	464	5	5	1	1
2	657	1	1	0	1057	5	5	2	1
2	135	27	1766	92	1091	1	1	3	3
2	552	23	17	5	1167	5	5	1	1
2	139	82	12000	347	932	1	1	3	3
2	43	2	6	0	661	4	4	2	1
2	256	1	1	0	703	5	4	2	1
2	844	1	15	0	1000	4	5	2	1
2	1428	0	2	0	907	5	5	2	1
2	168	1	3	0	84	5	4	2	1
2	46	3	3	0	1132	5	4	2	1
2	101	5	44	2	912	1	2	3	3
2	1666	3	3	0	635	5	3	2	1
2	275	2	4	0	1825	5	4	2	1
2	122	0	2	0	1628	2	3	2	1
2	84	1	2	0	1333	4	4	2	1
2	126	0	1	0	874	4	4	2	1
2	3174	1	10	0	1237	4	5	2	1
2	203	0	2	0	1462	5	4	2	1
2	281	0	0	0	1061	4	4	2	1
2	309	0	0	0	395	4	4	2	1
2	1660	4	3	0	387	5	4	1	1
2	157	1	5	0	930	3	3	2	1
2	60	1	3	0	1035	4	3	2	2
2	668	0	1	0	432	4	4	1	1
2	1580	0	1	0	154	4	4	1	2
2	62	1	2	0	946	3	3	1	1
2	46	0	2	0	641	4	4	2	2
2	270	0	1	0	1236	5	4	2	1
2	86	7	55	11	763	2	2	3	3
2	1495	20	14	1	820	5	5	1	1
2	79	0	3	0	255	2	1	2	3
2	250	6	8	0	1332	3	4	2	1
2	32	3	2	0	702	4	4	2	1
2	327	4	10	0	943	4	4	2	1
2	67	0	0	0	286	1	2	2	3
2	712	0	0	0	433	4	4	2	1
2	138	0	1	0	873	2	2	2	2
2	143	234	158	9	2088	5	5	2	1
2	5499	15	14	0	1159	5	5	1	1
2	107	0	2	0	519	3	3	2	2
2	20	2	143	4	949	2	1	2	1
2	61	0	1	1	755	2	3	2	3
2	22	0	2	0	1159	2	2	2	1
2	186	0	0	0	369	3	2	2	1
2	60	0	1	0	698	3	3	2	3
2	29	0	0	0	1194	3	3	2	1
2	73	1	34	0	318	4	4	1	1
2	160	0	0	0	355	3	3	2	1
2	156	0	0	0	378	3	3	2	1
2	176	0	0	0	360	3	3	2	1
2	279	1	1	2	1725	5	4	2	1
2	257	0	0	0	1431	4	4	2	1
2	203	2	32	2	615	4	5	2	1
2	1217	18	11	4	490	5	4	2	1
2	28	0	0	2	846	4	2	2	2
2	174	0	0	0	386	3	3	2	1
2	154	0	0	0	368	2	2	2	1
2	163	0	0	0	376	2	2	2	1
2	290	0	3	0	1155	5	5	1	1
2	839	37	13	0	1003	4	5	2	2
2	143	0	0	0	258	1	1	3	3
2	9	0	158	0	467	1	1	3	3
2	2253	18	9	1	890	4	3	1	1
2	205	0	0	0	430	2	2	2	1
2	101	1	15	0	826	3	3	2	1
2	86	3	3	0	719	3	3	2	1
2	1874	99	59	4	1180	4	4	2	1

## Sheet: Tiktok
Platform	Duration	Shares	Likes	Comments	Days since published	mDISCREN	GQS	Sources	Contents
1	213	66	328	28	71	4	5	1	1
1	17	1359	2674	1576	1142	1	1	3	3
1	53	80	221	97	250	3	2	2	2
1	15	640	70000	3527	1765	1	1	3	3
1	140	902	12000	1305	1406	2	3	3	3
1	37	33	136	10	483	3	2	2	2
1	88	79	445	171	164	2	1	2	2
1	199	380	2900	1038	457	1	2	3	3
1	138	963	2559	637	749	2	2	3	3
1	54	21	121	14	355	3	2	2	2
1	31	130	132	8	695	1	1	3	2
1	61	233	324	116	950	5	5	1	1
1	129	632	2020	344	213	3	3	2	3
1	82	531	24000	1100	457	3	3	2	3
1	49	1889	985	127	87	4	4	1	3
1	40	3670	19000	4852	940	5	4	1	2
1	21	4	26	1	268	4	4	1	1
1	17	9	69	3	262	3	3	2	1
1	45	118	312	124	942	4	5	1	1
1	22	204	257	127	998	5	5	1	1
1	90	82	444	35	301	5	5	1	1
1	134	180	628	360	579	2	2	3	3
1	43	846	9432	466	1126	2	2	3	3
1	149	237	492	55	282	5	4	1	1
1	51	39	171	126	564	4	5	2	1
1	42	89	2196	584	128	1	1	3	3
1	34	4	55	1	204	3	3	2	2
1	46	611	933	307	1014	3	2	2	1
1	53	121	307	58	271	4	3	2	2
1	148	71	194	23	243	4	3	2	1
1	67	10	113	135	744	2	1	3	1
1	35	45	94	40	580	5	3	2	1
1	20	477	7301	1634	990	1	1	3	3
1	55	493	1348	513	147	3	2	1	2
1	274	1169	2177	2177	137	4	3	3	1
1	158	619	2125	444	128	5	5	1	1
1	196	66	91	1	303	5	3	1	1
1	135	109	145	1	357	3	4	1	2
1	70	63	61	2	314	3	2	2	2
1	164	1483	8665	581	1362	2	2	2	2
1	66	1637	1986	912	241	3	3	1	2
1	61	3	66	2	386	1	2	2	1
1	72	182	319	52	500	4	4	1	1
1	60	181	659	93	44	3	3	1	2
1	64	7	68	10	237	4	4	1	2
1	94	1	30	3	97	3	4	2	2
1	47	11	50	16	340	3	3	2	1
1	54	20	139	94	376	2	1	3	3
1	161	46	267	111	119	1	2	3	3
1	15	12	320	294	865	2	2	1	3
1	150	53	415	64	66	5	4	1	1
1	164	1108	3363	2314	252	4	5	1	2
1	18	246	1133	431	989	2	1	3	3
1	10	81	469	228	959	3	3	1	1
1	10	63	606	969	903	1	1	3	3
1	241	214	235	176	373	4	5	1	1
1	105	106	160	13	840	3	4	1	2
1	13	57	6709	1283	982	1	1	3	3
1	58	304	553	141	674	3	4	1	1
1	20	6019	16000	5271	623	2	2	2	3
1	88	114	260	114	989	4	3	1	1
1	111	425	2582	333	283	4	3	1	2
1	35	290	302	46	803	2	2	1	3
1	44	147	990	291	266	3	4	1	1
1	54	19	80	17	227	2	3	2	2
1	70	72	14000	1522	97	2	2	2	3
1	16	16	80	16	831	3	2	2	2
1	50	6	110	8	62	4	5	1	2
1	118	667	9873	298	275	5	4	1	2
1	233	6576	85000	14000	232	2	1	3	3
1	43	8411	35000	5418	1309	4	3	1	1
1	19	43	92	8	633	2	2	1	1
1	60	80	181	223	790	2	1	3	3
1	151	94	1023	13	92	4	3	1	1
1	44	18	141	6	465	2	1	2	1
1	29	49	1254	791	223	1	1	3	3
1	16	55	86	2	394	2	3	2	1
1	150	10000	8050	5930	593	1	1	3	3
1	58	216	2193	559	847	1	2	3	3
1	52	1	29	0	148	4	3	2	1
1	34	136	325	124	1275	3	3	2	1
1	168	363	343	444	285	4	5	1	1
1	44	370	184	19	141	5	5	1	1
1	187	3187	32000	7901	1279	4	3	3	3
1	9	7349	5666	4045	249	3	3	1	1
1	196	15	10	0	124	5	5	1	2
1	10	1790	3537	3177	210	3	3	1	1
1	41	1551	2516	933	879	4	4	1	1
1	39	249	527	321	711	4	4	2	1
1	65	979	1461	476	875	5	4	1	1
1	176	37	72	2	313	5	5	1	1
1	22	70	108	1	687	3	3	1	1
1	74	115	363	691	388	3	2	3	3
1	131	4	91	47	993	1	1	3	3
1	63	6	110	45	195	3	3	2	1
1	69	97	78	17	218	3	3	3	1
1	25	185	269	88	975	4	3	2	1
1	111	231	512	125	1845	5	4	1	1
1	162	2168	6677	6349	242	5	5	2	1
1	6	79	551	275	777	3	2	1	1

## Sheet: Bilibili
Platform	Duration	Shares	Likes	Comments	Days since published	mDISCREN	GQS	Sources	Contents
2	2591	24	34	2	1280	5	5	2	1
2	658	2271	20	1	972	5	5	1	1
2	275	36	5	5	615	5	5	1	1
2	1502	17	7	0	680	4	5	2	1
2	2819	22	30	0	444	5	5	2	1
2	7759	9	9	0	248	5	5	2	1
2	367	20	22	2	943	4	5	2	1
2	1010	15	4	0	1003	5	5	2	2
2	1278	4	2	1	605	5	4	1	1
2	78	6	6	3	553	4	4	1	1
2	146	17	56	15	1176	2	2	3	3
2	739	30	30	0	1342	5	5	2	1
2	1729	3	0	0	89	5	5	1	1
2	126	31	11	0	1916	4	4	2	1
2	833	5	2	1	1005	5	5	1	1
2	1539	3	4	1	56	4	3	2	2
2	2120	18	12	0	717	4	5	2	2
2	241	10	5	0	1035	5	5	2	1
2	1902	12	30	2	1126	5	4	2	1
2	383	4	2	0	992	5	4	2	1
2	637	22	10	0	161	5	5	1	2
2	2464	68	47	1	1079	4	4	2	1
2	111	3	7	0	1332	4	4	2	1
2	731	3	8	0	968	5	5	2	1
2	2700	22	30	5	851	4	5	1	1
2	657	1	4	0	1077	5	4	2	1
2	307	207	660	117	1218	3	3	3	3
2	1651	5	4	0	48	3	4	2	1
2	3395	23	22	0	1276	4	4	2	1
2	2878	16	16	2	974	4	4	2	1
2	3405	7	5	2	355	5	4	2	1
2	1837	4	8	0	1262	4	4	2	1
2	842	3	2	0	464	5	5	1	1
2	657	1	1	0	1057	5	5	2	1
2	135	27	1766	92	1091	1	1	3	3
2	552	23	17	5	1167	5	5	1	1
2	139	82	12000	347	932	1	1	3	3
2	43	2	6	0	661	4	4	2	1
2	256	1	1	0	703	5	4	2	1
2	844	1	15	0	1000	4	5	2	1
2	1428	0	2	0	907	5	5	2	1
2	168	1	3	0	84	5	4	2	1
2	46	3	3	0	1132	5	4	2	1
2	101	5	44	2	912	1	2	3	3
2	1666	3	3	0	635	5	3	2	1
2	275	2	4	0	1825	5	4	2	1
2	122	0	2	0	1628	2	3	2	1
2	84	1	2	0	1333	4	4	2	1
2	126	0	1	0	874	4	4	2	1
2	3174	1	10	0	1237	4	5	2	1
2	203	0	2	0	1462	5	4	2	1
2	281	0	0	0	1061	4	4	2	1
2	309	0	0	0	395	4	4	2	1
2	1660	4	3	0	387	5	4	1	1
2	157	1	5	0	930	3	3	2	1
2	60	1	3	0	1035	4	3	2	2
2	668	0	1	0	432	4	4	1	1
2	1580	0	1	0	154	4	4	1	2
2	62	1	2	0	946	3	3	1	1
2	46	0	2	0	641	4	4	2	2
2	270	0	1	0	1236	5	4	2	1
2	86	7	55	11	763	2	2	3	3
2	1495	20	14	1	820	5	5	1	1
2	79	0	3	0	255	2	1	2	3
2	250	6	8	0	1332	3	4	2	1
2	32	3	2	0	702	4	4	2	1
2	327	4	10	0	943	4	4	2	1
2	67	0	0	0	286	1	2	2	3
2	712	0	0	0	433	4	4	2	1
2	138	0	1	0	873	2	2	2	2
2	143	234	158	9	2088	5	5	2	1
2	5499	15	14	0	1159	5	5	1	1
2	107	0	2	0	519	3	3	2	2
2	20	2	143	4	949	2	1	2	1
2	61	0	1	1	755	2	3	2	3
2	22	0	2	0	1159	2	2	2	1
2	186	0	0	0	369	3	2	2	1
2	60	0	1	0	698	3	3	2	3
2	29	0	0	0	1194	3	3	2	1
2	73	1	34	0	318	4	4	1	1
2	160	0	0	0	355	3	3	2	1
2	156	0	0	0	378	3	3	2	1
2	176	0	0	0	360	3	3	2	1
2	279	1	1	2	1725	5	4	2	1
2	257	0	0	0	1431	4	4	2	1
2	203	2	32	2	615	4	5	2	1
2	1217	18	11	4	490	5	4	2	1
2	28	0	0	2	846	4	2	2	2
2	174	0	0	0	386	3	3	2	1
2	154	0	0	0	368	2	2	2	1
2	163	0	0	0	376	2	2	2	1
2	290	0	3	0	1155	5	5	1	1
2	839	37	13	0	1003	4	5	2	2
2	143	0	0	0	258	1	1	3	3
2	9	0	158	0	467	1	1	3	3
2	2253	18	9	1	890	4	3	1	1
2	205	0	0	0	430	2	2	2	1
2	101	1	15	0	826	3	3	2	1
2	86	3	3	0	719	3	3	2	1
2	1874	99	59	4	1180	4	4	2	1
